# Supplementary material
Source: Copernicus journal article supplement (doi:10.5194/egusphere-2026-2934)
Supplement: Supplementary file 1 [file egusphere-2026-2934-supplement.pdf]

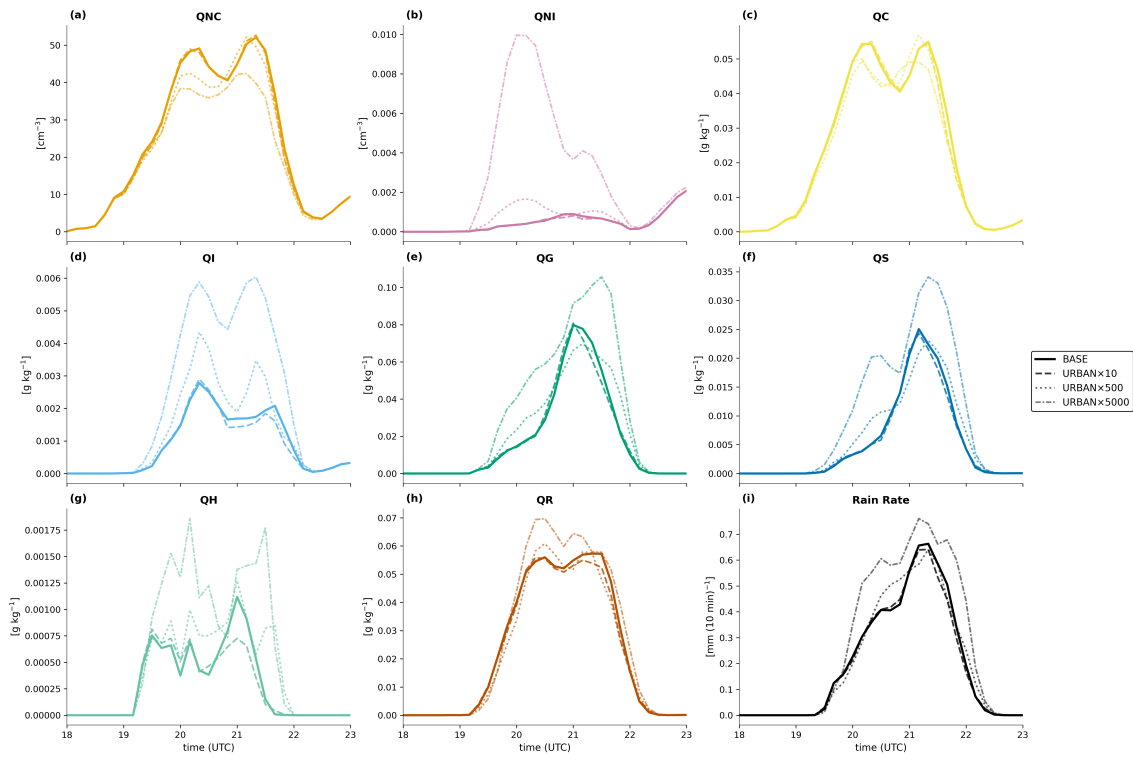

**Figure S1.** Horizontally averaged and layer-thickness-weighted vertical averages (0 - 13 km) time series for case I of number concentrations of (a) activated cloud droplets (QNC) and (b) activated ice crystals (QNI), as well as mass mixing ratios of (c) cloud water, (d) ice, (e) graupel, (f) snow, (g) hail, (h) rain; panel (j) shows box-averaged rain rate. Line styles correspond to the emission experiments: BASE (solid), URBANx10 (dashed), URBANx500 (dotted), URBANx5000 (dash-dotted).

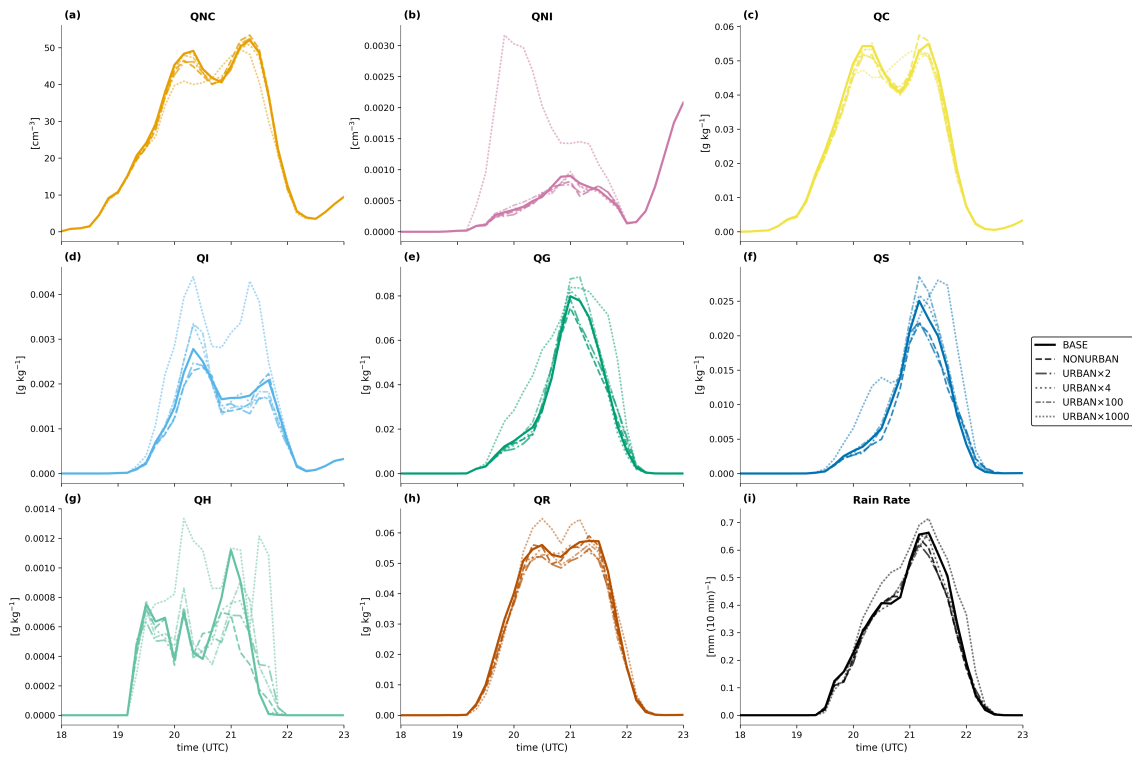

**Figure S2.** Horizontally averaged and layer-thickness-weighted vertical averages (0 - 13 km) time series for case II of number concentrations of (a) activated cloud droplets (QNC) and (b) activated ice crystals (QNI), as well as mass mixing ratios of (c) cloud water, (d) ice, (e) graupel, (f) snow, (g) hail, (h) rain; panel (j) shows box-averaged rain rate. Line styles correspond to the emission experiments: BASE (solid), URBAN×10 (dashed), URBAN×500 (dotted), URBAN×5000 (dash-dotted).
